# Supplementary material
Source: publisher figshare collection journal article supplement (https://frontiersin.figshare.com/ndownloader/files/34024010)
Supplement: Supplementary file [file 34024010]

**New Insights Into the Function of Flavohemoglobin in *Mycobacterium tuberculosis*: Role as a NADPH-Dependent Disulphide Reductase and D-Lactate-Dependent Mycothione Reductase**

*Naveen Thakur<sup>1</sup>, Amar Nath Sharma<sup>1</sup>, Mangesh Dattu Hade<sup>1</sup>, Ajay Chhaya<sup>2</sup>, Ashwani Kumar<sup>1</sup>*

*Ravinder Singh Jolly<sup>1</sup> and Kanak L. Dikshit<sup>1,2</sup>*

*<sup>1</sup>CSIR-Institute of Microbial Technology, Sector 39A, Chandigarh 160036, India*

*<sup>2</sup>Department of Biotechnology, BMS Block, Sector 25, Panjab University, Chandigarh 160014, India*

*Corresponding author: Kanak L Dikshit*

*E.mail: kanakdikshit@pu.ac.in*

## SUPPLEMENTARY MATERIAL

### Experimental Procedures

#### **List of primers used for the construction of the *fhb* gene knockout strains of mycobacteria**

Primer sets used for the construction of *fhb* gene knock out strain of *Mtb*

SpeI upstream Forward -5'-GTACATGGCACTAGTTGCTTGCGGTATTCGTCC-3'

SwaI upstream Reverse – 5'-GGAGCCAATTTAAAT GCAAACCAATGGGCATAG-3'

Pac I Downstream Forward- 5'-GTGCTCGTTAATTAAACCAAGGCCGCCCTGATCG-3'

Nsi I Downstream reverse – 5'-GTAGCTGCCATGCAT CGACAAGTTGCCAGCAACC-3'

Primer sets used for the construction of *fhbII* gene knock out strain of *M. smegmatis*

SpeI upstream Forward – 5'-GTACATGGCACTAGTGGCGTTACCCTCACATTC-3'

SwaI upstream Reverse – 5'-GGAGCCAATTTAAATGGCGCTGCTCGGCCATCTCGG-3'

Pac I Downstream Forward- 5'-GTGCTCGTTAATTAAAGGGACGCTCGCGGACGTCG-3'

Nsi I Downstream reverse – GTAGCTGCCATGCATGTCATGGTCGACGAATTG

#### **Primer sets used for the construction of cysteine mutants of *Mtb*FHb**

Primer set for *Mtb*FHb<sup>cys188ala</sup> mutant

5'- ATT CTG ATC GCC GGT GGA CCG GCC ATG GTC -3'

5'- CGG TCC ACC GGC GAT CAG AAT CTG CCG ATC -3'

Primer set for *Mtb*FHb<sup>cys299ala</sup> mutant

5'- CGC TAT GCC GCC GAA CTC TAC GAC CTG -3'

5'- GTC GTA CAG TTC GGC GGC ATA GCG TGC TCC-3'

Primer set for *Mtb*FHb<sup>cys360ala</sup> mutant

5'-GTT CCG CAA GCC GGG CGC CGG TGG CGA TAT CTC TCG-3'

5'-CCA CCG GCG CCC GGC TTG CGG AAC CAC GTT-3'

Primer set for qRT-PCR of Rv0385 (*Mtb*FHb)

5'-CTTCTATGCCCATTGGTTTGCC-3'

5'- GTTGACAGCATGACCCAACC-3'

Primer set for qRT-PCR of MS\_MEG0719 (*Ms*FHbII)

5'-CCGCGACTTCTACACCAACTG-3'

5'- GACAACGCAGTGTGGCATAAAC-3'

## EXPERIMENTAL PROCEDURES

### Chemical synthesis of *des-myo-inositol-mycothiols*

#### Materials:

All reagents, unless mentioned otherwise, were purchased from Sigma-Aldrich India Ltd. *N*- $\alpha$ -Fmoc-S-acetamidomethyl-L-cysteine pentafluorophenyl ester was purchased from Santa Cruz Biotechnology. Experiments were performed at 25 °C unless otherwise specified. <sup>1</sup>H NMR spectra were obtained at Jeol ECX 300 MHz spectrometer at 25 °C and referenced to TMS (0.0 ppm) or the residual solvent peak (H<sub>2</sub>O, 4.66 ppm). LC-MS was done using Agilent Technologies G1316C and chromatography was performed on a reverse-phase column (Agilent C18, 2.1×50 mm; 1.8-Micron; ZORBAX Eclipse plus, USA). LC-MS analysis was conducted on Agilent G6550A MSQTOF. The whole output of column was introduced into the ESI-MS probe. The source voltage for electrospray was 3.5 kV and the fragmentation voltage was 150 V. The compound 5 was prepared following earlier published procedures (Patel and Blanchard, 1998) with slight modifications.

**Chemical synthesis of *des-myo-inositol-mycothiols*** (synthesised following the published procedure of Patel and Blanchard, 1998)

#### 1. Synthesis of *N*- $\alpha$ -Fmoc-S-acetamidomethyl-L-cysteinyl-2-amino-2-deoxy- $\alpha$ -D-glucopyranoside (formula 3, Fig S4A)

17.25 ml of a 1M NaOH (0.69 g, 17.29 mmol) solution was added slowly in a dropwise manner by syringe to D-glucosamine hydrochloride (formula 1 Fig S4A, 3.71g, 17.29 mmol). The mixture was stirred for 10 minutes. Water was removed in *vacuo* and resulting D-glucosamine and NaCl slurry was used for further reaction. Hydroxybenzotriazole, HOBt (930 mg, 6.91

mmol) was added to solution of *N*- $\alpha$ -Fmoc-*S*-acetamidomethyl-L-cysteine pentafluorophenyl ester (formula **2** Fig S2A, 2 g, 3.45 mmol) in dimethylformamide (DMF). This solution was transferred to slurry of D-glucosamine and NaCl, and contents stirred under a dry nitrogen environment for 2 hours. The solvent DMF was removed in *vacuo* and coupling product **3** was precipitated by addition of water (100 mL). The precipitate was collected by filtration and washed with water to remove excess of D-glucosamine, NaCl, HOBT, pentafluorophenol, and residual DMF. The resultant product was dried under *vacuo* to yield compound of formula **3** (Fig S4A) as a white solid (1.5 g, 75%). TLC of the product indicated the presence of a single compound (1:1 hexane/EtOAc,  $R_f$  0.1).

## 2. Synthesis of *N*-acetyl-*S*-acetamidomethyl-L-cysteinyl-2-amino-2-deoxy- $\alpha$ -D-glucopyranoside (product **4**, Fig S4A)

A solution of Fmoc coupled product (formula **3** Fig S4A, 1.4 g, 2.43 mmol) and piperidine (0.5 ml) in DMF (5 ml) was stirred for 2 hours. The solvent was evaporated in *vacuo* and cleaved dibenzofulvene was precipitated with water (100 ml). The precipitate was separated by using a 0.22  $\mu$ m cellulose filter (Millipore). The aqueous part containing amine and residual piperidine and DMF was evaporated in *vacuo*. The amine was sticky solid and used for *N*-acetylation without purification. The amine was dissolved in aqueous  $K_2CO_3$  (265 mg, 1.61 mmol, 3 ml) and then acetic anhydride (90 mg, 0.89 mmol) was added to this solution. The solution was stirred for 2 hours and solvents evaporated in *vacuo*. The solid residue was treated with EtOH to precipitate  $K_2CO_3$ . After precipitation, ethanol was evaporated in *vacuo* and solid residue was purified by preparative HPLC [Merck C18, 250 $\times$ 10 mm, detection UV at 210 nm, 0 to 50 min (100%  $H_2O$ , 3 ml/min), 50-75 min (100% MeOH, 3 ml/min),  $t_R$ : 21.83 min] to yield compound of formula **3**, Fig S4A as white powder, which was characterised by NMR.  $^1H$  NMR (Fig S4B, 300 MHz,  $D_2O$ ):  $\delta$  5.07-5.06 (d, 1H), 4.48-4.43 (m, 1H), 4.27-4.14 (m, 2H), 3.89-3.30 (m, 6H), 3.01-2.92 (dd, 2H), 2.09 (s, 3H), 2.05 (s, 3H). This spectrum contains two isomers due to mutarotation of the glucosamine pyranose ring in  $D_2O$ .

## 3. Synthesis of *N*-acetyl-L-cysteinyl-2-amino-2-hydroxy- $\alpha,\beta$ -D-glucopyranoside disulphide (product **5**, Fig S4A)

Compound of formula **4**, Fig S4A (110 mg, 0.27 mmol) was added to solution of anisole in trifluoroacetic acid (TFA) at 4  $^\circ C$  and the contents magnetically stirred in an oven-dried Schlenk flask under an argon atmosphere. Tallium (III) trifluoroacetate (160 mg, 0.28 mmol) was added and stirring continued for further 2 hours. Solvent was evaporated in *vacuo* and

residue triturated with ether (50 ml). The ether layer was decanted and this process was repeated 2 more times with ether. The ether layer was evaporated in *vacuo* and residue was purified by preparative HPLC using same procedure which was used **in step 2** to yield 29 mg of white solid (yield 25%). The product (formula **5**, **Fig S4A**) was characterised by NMR and mass spectroscopy. <sup>1</sup>H NMR (**Fig S4C**, 300 MHz, D<sub>2</sub>O): δ 5.09-5.07 (d, 1H), 4.771H) (overlap with D<sub>2</sub>O), 3.87-3.31 (m, 6H), 3.16-2.79 (dd, 2H), 1.94 (s, 3H). Due to presence of diastereomers, the anomeric proton did not integrate to one; see explanation above for **4**. LC-MS (Fig [Agilent C18, 2.1 ×50 mm, 0 min (100% H<sub>2</sub>O), 8.0 min (98% H<sub>2</sub>O, 2% CH<sub>3</sub>CN) 10 min (80% H<sub>2</sub>O, 20% CH<sub>3</sub>CN), 12 min (60 % H<sub>2</sub>O, 40% CH<sub>3</sub>CN), 14.0 min (40 % H<sub>2</sub>O, 60% CH<sub>3</sub>CN), 16.0 min (20% H<sub>2</sub>O, 80% CH<sub>3</sub>CN, ) 18.0 min (100% CH<sub>3</sub>CN) , 0.4 ml/min, t<sub>R</sub>: 3.81-4.20 min] ESI-MS (Observed): m/z 628.17 (M-H<sub>2</sub>O)<sup>+</sup>, (Calculated) 628.17 (M-H<sub>2</sub>O)<sup>+</sup>

## Reference

1. Patel, M. P., & Blanchard, J. S., 1998. Synthesis of Des-myo-inositol mycothiol and demonstration of a mycobacterial specific reductase activity. *Journal of the American Chemical Society*, **120**, 11538-11539).

## Supplementary Figures

|                        |                                                                | B9B10 | CD1CD2 | E7 |
|------------------------|----------------------------------------------------------------|-------|--------|----|
| <i>M. tuberculosis</i> | MGLEDRDALRVLQNAFKLD-----DPELVRRFYAHWFALDASVRDLFPPDMGAQRAA      |       |        |    |
| <i>M. smegmatis</i>    | -----MLRAAVDPAND-----SDPLIRDFYTNWFAADLSVRDLFPPPEMAEQRRV        |       |        |    |
| <i>M. avium</i>        | MSLEDADALRVLRDAFAPCD-AGRPGDSGDLVHRFYTHWFALDPSVRDLFPPPEMGAQORVA |       |        |    |
| <i>M. africanum</i>    | MGLEDRDALRVLQNAFKLD-----DPELVRRFYAHWFALDASVRDLFPPDMGAQRAA      |       |        |    |
| <i>M. marinum</i>      | MGLEDRDALRVLRDAFAPQPDLDHKTQSSELVRSFYTNWFSLDSSVRDLFPPPEMSGQRAA  |       |        |    |
| <i>M. ulcerns</i>      | MGLEDRDALRVLRDAFAPQPDLDHKTQSSELVRSFYTNWFSLDSSVRDLFPPPEMSGQRAA  |       |        |    |
| <i>M. gordonae</i>     | MGLEDRDALQVLQDAFAPG-----STELVHRFYDHWFALDTSVRDLFPPPEMSGQRAA     |       |        |    |
| <i>M. gilvum</i>       | -----MRILREAFEPGPG-----SERLVGEFYTRWFAADLTARDLFPPDMAGQORQV      |       |        |    |

|                        |                                                               | F7F8 | G5 |
|------------------------|---------------------------------------------------------------|------|----|
| <i>M. tuberculosis</i> | FGQALHWVYGELVAQRAEEPVAFLAQLGRDHRKYGVLPQYDTLRRALYTTLRDYLGHPS   |      |    |
| <i>M. smegmatis</i>    | FAHALTWLFGELIAQRAEDPITFLAQLGRDHRKYGVTPQHYDSMQSALYGALKARLA---  |      |    |
| <i>M. avium</i>        | FGHALHWVYGELVARRAQEPVAFLAQLGRDHRKYGVLPQHYDTLRRALYTTLRDYLGHPS  |      |    |
| <i>M. africanum</i>    | FGQALHWVYGELVAQRAEEPVAFLAQLGRDHRKYGVLPQYDTLRRALYTTLRDYLGHPS   |      |    |
| <i>M. marinum</i>      | FTRALHWVYSELVAQRAEEPIAFLAQLGRDHRKYGVQPTQYETLRRALQTTLRSHLG---  |      |    |
| <i>M. ulcerns</i>      | FTRALHWVYSELVAQCAEEPIAFLAQLGRDHRKYGVQPTQYETLRRALQTTLRSHLG---  |      |    |
| <i>M. gordonae</i>     | FAQAMHWLYGELVAQRADEPVAFLAQLGRDHRKYGVLPQHYDTLRRALYATLRSHLG---  |      |    |
| <i>M. gilvum</i>       | FAHAMRWLCDELIAQRAEEPVAFLAQLGRDHRKYGVTPQHYAGLQDALLAAVRTTTLT--- |      |    |

|                        |                                                               |
|------------------------|---------------------------------------------------------------|
| <i>M. tuberculosis</i> | RGAWTDAVDEAAGQSLNLIIGVMSGAADADDAPAWWDGTVVEHIRVSRDLAVARLQQLDRP |
| <i>M. smegmatis</i>    | -DRWTDRLAAATRDVAALFIGVMRGAADAEESPAYCDGTVVETHRLTRDVS VIRLQLEDP |
| <i>M. avium</i>        | -AAWTDAVEDAARTSLNLIIGVMSGAADADEGPAWWDGTVIGHLRVSRDLAVVRLRLDQP  |
| <i>M. africanum</i>    | RGAWTDAVDEAAGQSLNLIIGVMSGAADADDAPAWWDGTVVEHIRVSRDLAVARLQQLDRP |
| <i>M. marinum</i>      | -SSWTDVARAAEQSLNLIIGVMSGAADSEDGPAWWDATVIEHIPASRDLAVIRLQQLDHP  |
| <i>M. ulcerns</i>      | -SSWTDVARAAEQSLNLIIGVMSGAADSEDGPAWWDATVIEHIPASRDLAVIRLQQLDHP  |
| <i>M. gordonae</i>     | -SFWTDAVQEAADQSLNLIIGVMSGAADSDAPAWWDGTVIEHNRVSRDLAVVRLHLDRP   |
| <i>M. gilvum</i>       | -DRWDARLEEAATDVVTLAVGVMSGAGAEATAPPFCGTVLEHLRPTDVS VIRLQKMDHH  |

|                     |                                                                 |
|---------------------|-----------------------------------------------------------------|
| <i>M. smegmatis</i> | LFYHSGQYVTVQVPQWPRRWRYLSIPAIPSDRSGAIEFHVRSVTGGMVSTAI VNETRHGDR  |
| <i>M. avium</i>     | MPYHPGQYVNVQVPQCPRRRWRYLSIPAIPADPGCGIEFHVRLVPGGLVSTAI VNETRPGDR |
| <i>M. africanum</i> | LHYYPGQYVNVHVPQCPRRRWRYLSIPAIPADPNRGIEFHV RVVPGGLVSNAIVGETRPGDR |
| <i>M. marinum</i>   | MPYHPGQYVNVQVPQCPRRRWRYLSIPAIPADLEGRIEFHV RVVPGGLVSTAMVNETRTGDR |
| <i>M. ulcerns</i>   | MPYHPGQYVNVQVPQCPRRRWRYLSIPAIPADLEGRIEFHV RVVPGGLVSTAMVNETRTGDR |
| <i>M. gordonae</i>  | LHYHPGQYVNVQIPQCPRRRWRYLSIPAIPADPGGGIEFHV RVVPGGLVSNAIVGETRPGDR |
| <i>M. gilvum</i>    | IDYHAGQYVSVQVPQWPRRWRYLSIPAIPADPGGYVEFHVRSVAGGMVSTTILGETRPGDR   |

|                        | LDH FAD motif1                                                | LDH FAD motif 2 |
|------------------------|---------------------------------------------------------------|-----------------|
| <i>M. tuberculosis</i> | WRLSGPHGAFRVDRIGGDVLMVAGSTGLAPLRALIMDLRSFVAVNPRVHLFFGARYACELY |                 |
| <i>M. smegmatis</i>    | WRVSSPHGALEVNRSIGEDVLMVAGSTGLAPLRALIMDMTLHAENPRVHLFFGGRFPCDLY |                 |
| <i>M. avium</i>        | WRLSSPHGGLRVDRIGGDVLMVAGSTGLAPLRALIMDLRSFVAVNPRVHLFFGARYRCELY |                 |
| <i>M. africanum</i>    | WRLSGPHGAFRVDRIGGDVLMVAGSTGLAPLRALIMDLRSFVAVNPRVHLFFGARYACELY |                 |
| <i>M. marinum</i>      | WRLASPHGGLHVDRTIGGDVLMVAGSTGLAPLRALIMDMGRFVENPRVHLFFGARYFCELY |                 |
| <i>M. ulcerns</i>      | WRLASPHGGLHVDRTIGGDVLMVAGSTGLAPLRALIMDMGRFVENPRVHLFFGARYFCELY |                 |
| <i>M. gordonae</i>     | WRLSGPHGGLRVDRIGGDVLMVAGSTGLAPLRALIMDLRSFVAVNPRVHLFFGARYRCELY |                 |
| <i>M. gilvum</i>       | WRLAAPHGAMHVDREAGGDVLMVAGSTGLAPLRALIMDMCRFVANPRVHLFFGAKYPCELY |                 |

trxR like FAD-motif

|                        |                                                               |
|------------------------|---------------------------------------------------------------|
| <i>M. tuberculosis</i> | DLPTLWQIAAHNPWLSVSPVSEYNGDPWAADYPDVSAPRGLHVRQTGRLPDVVSRYGGW   |
| <i>M. smegmatis</i>    | DLKTLWTIASNPNWLSVTPVSEYSTDPWARDYPDTPPRGLHVRQTGTLDVVTTRYGNW    |
| <i>M. avium</i>        | DLPTLWQIAASHNPWLSVSPVSEYRADPPWAADYPDVTTPRGLHVRQTGRLPDVVSRYGGW |
| <i>M. africanum</i>    | DLPTLWQIAAHNPWLSVSPVSEYNGDPWAADYPDVSAPRGLHVRQTGRLPDVVSRYGGW   |
| <i>M. marinum</i>      | DLRTLWQVAAHNPWLSVSPVAEYKLDPSWATDYPDVSPPRGLHVRQTGRLAEVVTNYGNW  |
| <i>M. ulcerns</i>      | DLRTLWQVAAHNPWLSVSPVAEYKLDPSWATDYPDVSPPRGLHVRQTGRLAEVVTNYGNW  |
| <i>M. gordonae</i>     | DLRTLWQVAAHNPWLSVSPVSEYNNDPWAADYPDVSPPRGLHVRQTGRLPDVVTTRYGAW  |
| <i>M. gilvum</i>       | DLPTLWEVASMNPWLSVTPVSEFDFFPWAAEYPDNRPGRGLHVRQTGRLPDEVVTTRYGSW |

|                        | NADPH :Adenine                          | Glu394 |
|------------------------|-----------------------------------------|--------|
| <i>M. tuberculosis</i> | GDRQILICGGPAMVRATKAALIAKGAPPERIQHDPLSR- |        |
| <i>M. smegmatis</i>    | GDRQILICGGPQMVETKAALIAKGAPPERIQHDPLTAR  |        |
| <i>M. avium</i>        | GDRQILICGGPRMVATKAALIAKGAAQRIQHDPLSR-   |        |
| <i>M. africanum</i>    | GDRQILICGGPAMVRATKAALIAKGAPPERIQHDPLSR- |        |
| <i>M. marinum</i>      | GDRQILICGGPAMVRTTKAALIAKGAPRERIQHDPLP-- |        |
| <i>M. ulcerns</i>      | GDRQILICGGPAMVRTTKAALIAKGAPRERIQHDPLP-- |        |
| <i>M. gordonae</i>     | GDRQILICGGPQMVATKAALIAKGAPPELIQHDPLSR-  |        |
| <i>M. gilvum</i>       | GDRQILVCGRPEMVAATRSALIAKGAPAERIQHDPLGN- |        |

**Fig. S1. Sequence alignment of *Mtb*FHb with type II FHbs of mycobacteria.** Conserved residues in the heme and reductase domains are marked and highlighted in yellow color. Thioredoxin reductase type FAD binding site is highlighted in grey and conserved sequences [D(x)8GxxP] are shown in red. D-LDH-type FAD finding sites 1 and 2 [A(x)7AxN, G(x)7GS] are shown in green outlined boxes. Conserved residues are shown in orange and mutated residues within the FAD binding motif are underlined.

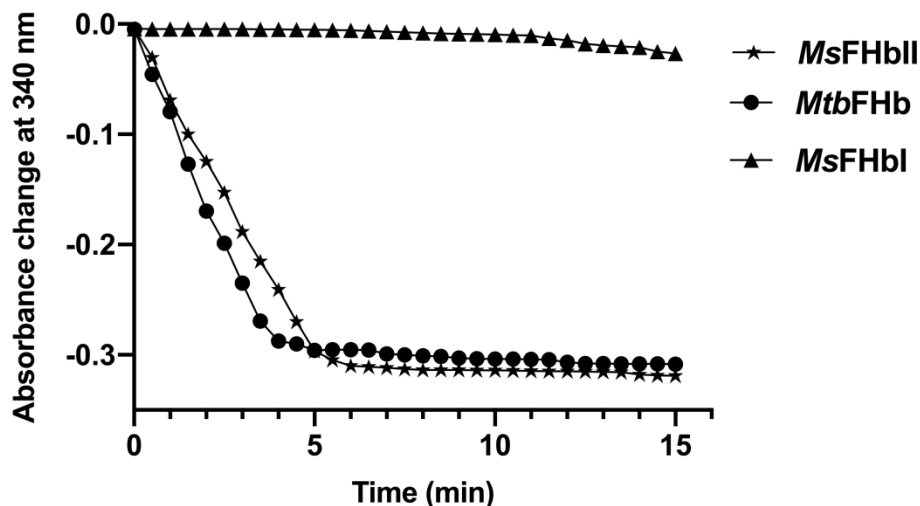

**FIGURE S2 . NADPH oxidase activity of type I (*MsFHbI*) and type II FHbs of *M. smegmatis* (*MsFHbII*) and *Mtb* (*MtbFHb*).** The reaction was set up in 0.5 ml containing NADPH (250  $\mu$ M), 0.5 M potassium phosphate buffer (pH 7.2) and 1 mM EDTA. Baseline level of NADPH oxidation was set before addition of the protein in the reaction mixture. Oxidation of NADPH was monitored spectrophotometrically at 340 nm after adding 8  $\mu$ M of protein (*MsFHbI*, *MsFHbII* or *MtbFHb*) in the reaction mixture.



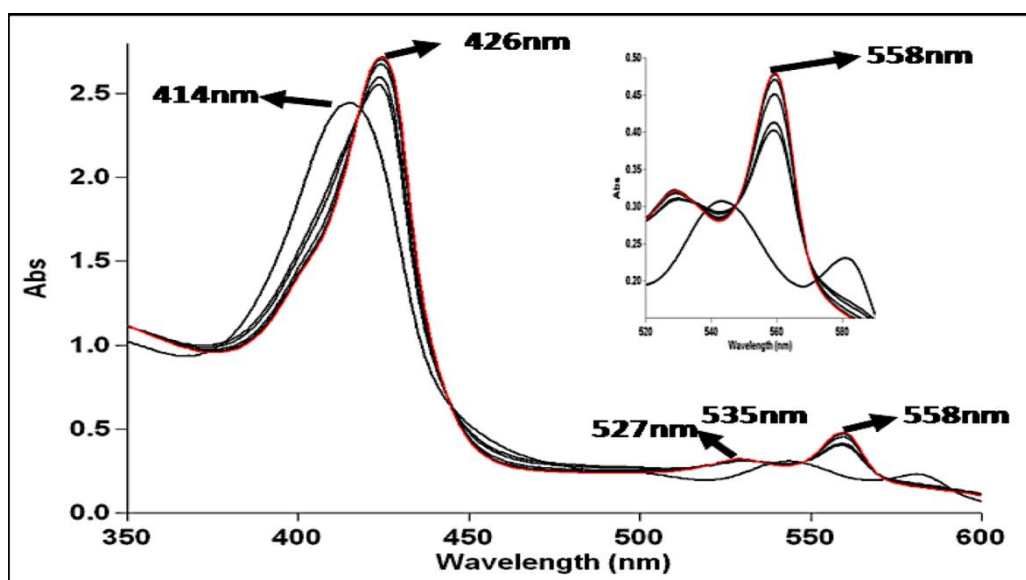

**FIGURE S3. D-lactate mediated reduction of oxy-*MtbFhb*.** Absorption spectra of *MtbFhb* in the native (oxy-*MtbFhb*, showing 414 Soret peak) and after reduction with D-lactate (red line). Scans were taken every after five seconds. Inset shows the enlarged view of the spectra from 520 nm to 600 nm

4A

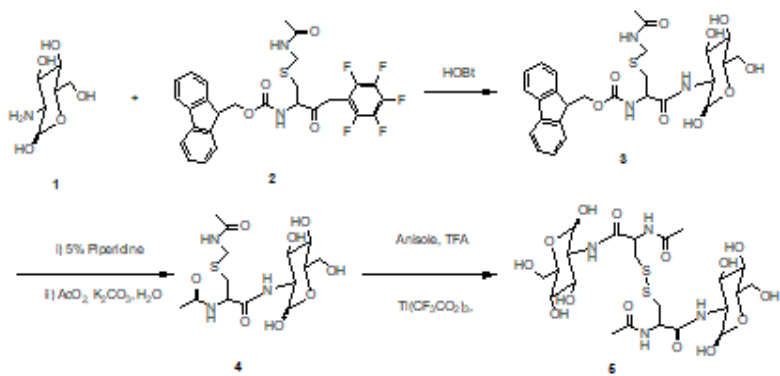

4B

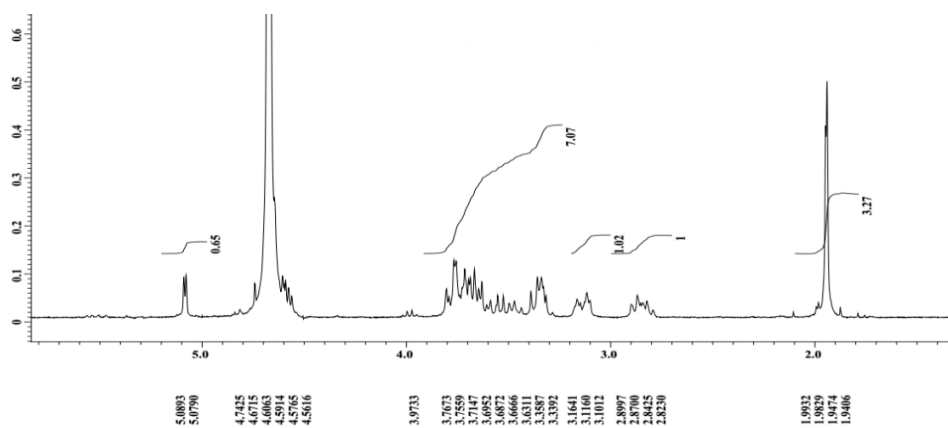

4C

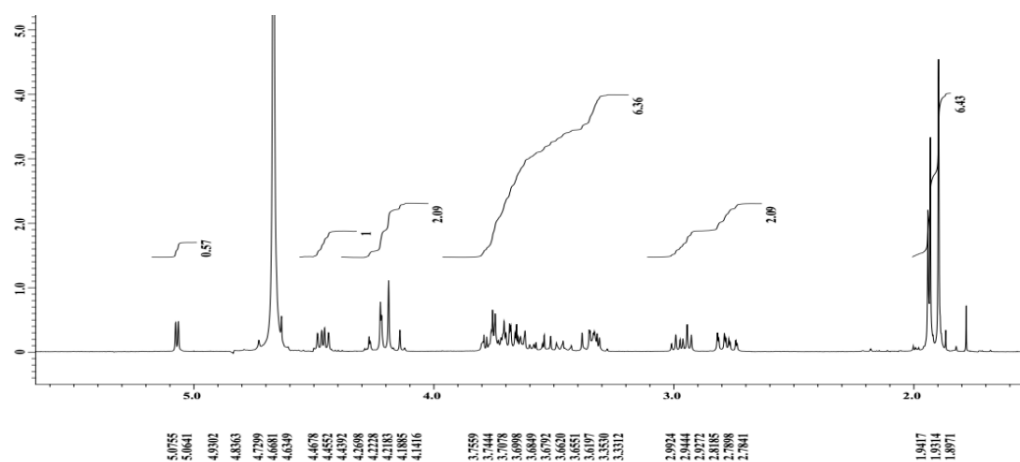

**FIGURE S4. Chemical synthesis of des-myo-inositol mycothiol.** (A) Steps showing preparation reactions for the synthesis of des-myo-inositol- mycothiol . **B.**  $^1\text{H}$ NMR spectra of N- $\alpha$ -Fmoc-S-acetamidomethyl-L-cysteinyl-2-amino-2-deoxy- $\alpha$ -D-glucopyranoside and **C.**  $^1\text{H}$ NMR spectra of N-acetyl-L-cysteinyl-2-amino-2-deoxy- $\alpha$ -D-glucopyranoside

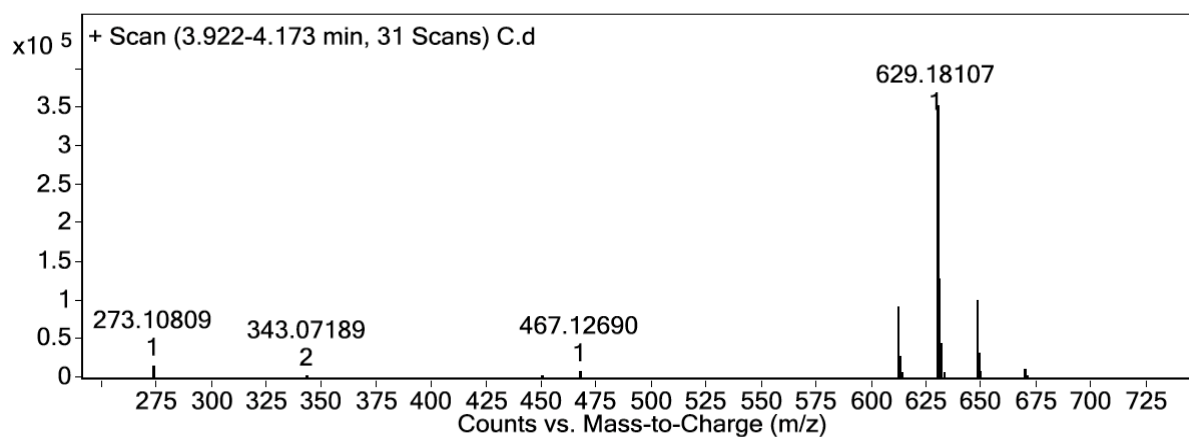

**FIGURE S5. Mass spectrophotometric analysis of des-myoinositol (synthetic analog of mycothione) in the presence of NADPH.** The assay was performed in 100  $\mu$ l reaction mixture containing 50 mM HEPES (pH 7.6) and 0.1 mM EDTA. *Mtb*FHb (5 $\mu$ g each) was incubated individually with 100  $\mu$ M des myo-inositol-mycothione along with 250  $\mu$ M NADPH at 25°C for 5 min and the product was analysed via LC-MS

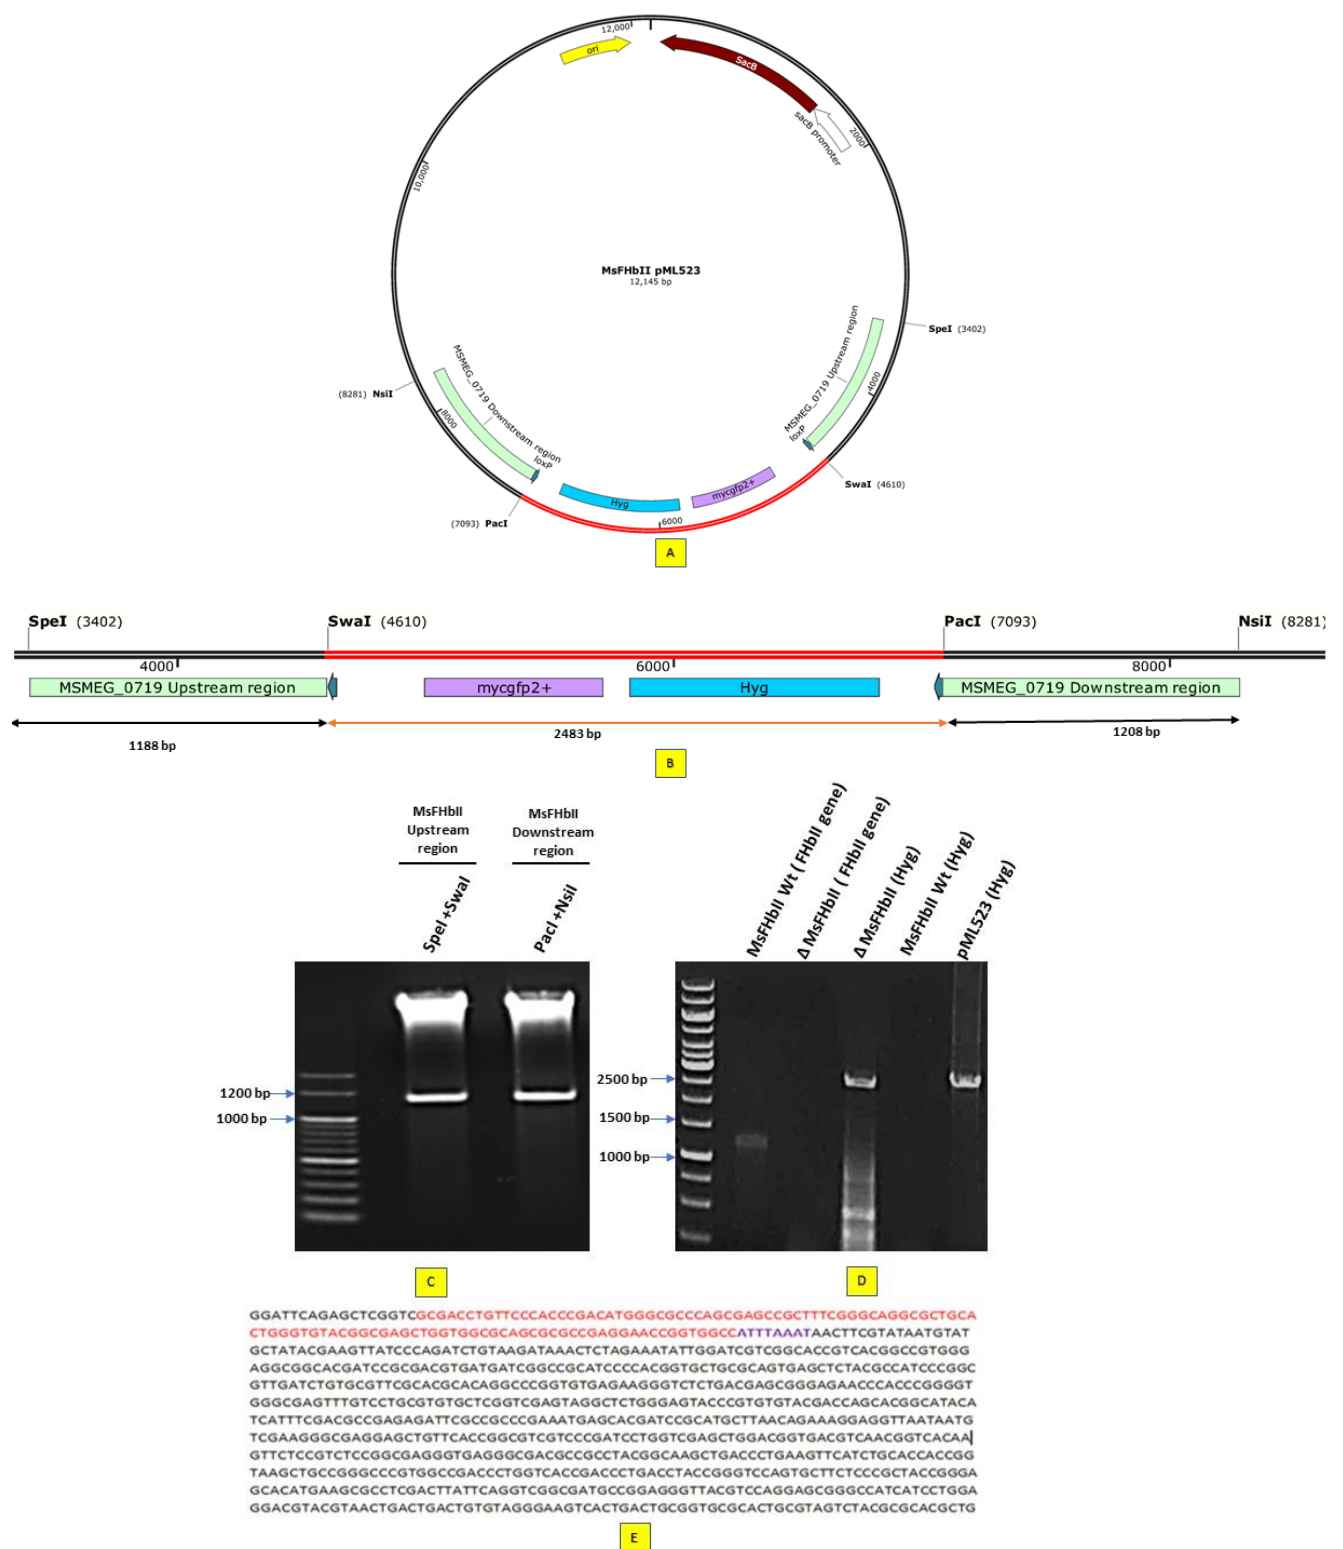

**Fig S6. PCR analysis and confirmation of *fhbII* gene deletion in *M. smegmatis*.** **A:** Full circular map of the *fhbII* gene knock out plasmid, Ms FHbII pml253 (pML523<sup>MsFHbII</sup>). **B.** Schematic presentation of the region showing integration of upstream and downstream region

of the *fhbII* gene of *M. smegmatis* with mycgfp2+ and hygromycin cassette in pML523<sup>MsFhbII</sup>

**C:** Confirmation of upstream and downstream region of the *fhbII* gene of *M. smegmatis* in pML523<sup>MsFhbII</sup> with gene specific restriction enzymes digestion. **D:** Confirmation of *fhbII* gene knockout in *M. smegmatis* by amplifying the *fhbII* gene specific primers and the mycgfp2+ - Hygromycin cassette specific primers using the genomic DNA of wild type and the *fhbII* gene knock out strains of *M. smegmatis*. **D:** Confirmation of *fhbII* gene deletion after nucleotide sequencing of PCR product generated from the genomic DNA of MsΔ*fhbII* (*fhbII* gene knock out *M. smegmatis*) using upstream and downstream primers of *fhbII* gene of *M. smegmatis*. Sequences in red are showing the upstream region of the *fhbII* gene lacking the coding sequences and the sequences of hygromycin gene.

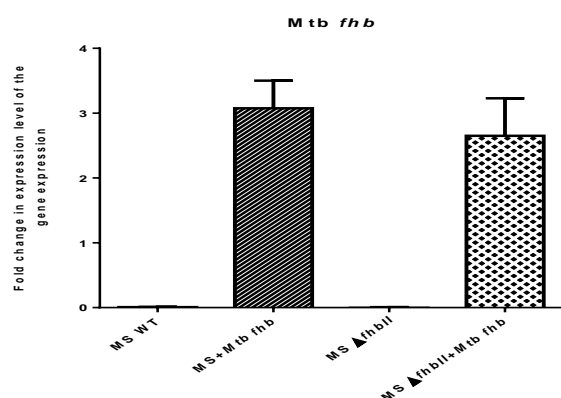

**Fig. S7. Transcript analysis during expression of *Mtb fhb* gene in *M. smegmatis*.** qRT-PCR analysis of the *Mtb fhb* gene transcript during overexpression of *Mtb fhb* gene expressing wild type and MS $\Delta$ fhbII strains of *M. smegmatis*. *M. smegmatis* cultures were grown aerobically till the O.D<sub>600</sub> reaches to 1.0 under the condition mentioned in experimental procedures. Thereafter, samples were withdrawn and analysed through qRT-PCR in triplicate. Relative fold changes in *Mtb fhb* gene expression were analysed for each biological replicate using Livak ( $2^{-\Delta\Delta C_t}$ ) method and normalized with respect to housekeeping gene *sigA*. Statistical analysis was performed by one-tailed t-test using GraphPad Prism version 8.4.3 for Windows ( $p < 0.01$ ).
